# Supplementary material for: Hypercoordinated Si/Ge driving excellent HER catalytic performance in new TM2X (X = Si and Ge) monolayers: a high-throughput investigation by screening transition metal elements
Source: Royal Society of Chemistry journal article supplement (doi:10.1039/d4qi01576b), 2024-01-01
Supplement: d4qi01576b1.pdf [file d4qi01576b1.pdf]

## Supporting Information

# Hypercoordinated Si/Ge Driving Excellent HER Catalytic Performance in New $\text{TM}_2\text{X}$ (X = Si and Ge) Monolayers: A High-Throughput Investigation by Screening Transition Metal Elements

Tianya Li<sup>a</sup>, Guangtao Yu<sup>a,\*</sup>, E Yang<sup>a</sup>, Wei Chen<sup>a,b,c,\*</sup>

<sup>a</sup>Engineering Research Center of Industrial Biocatalysis, Fujian Provincial Key Laboratory of Advanced Materials Oriented Chemical Engineering, Fujian-Taiwan Science and Technology Cooperation Base of Biomedical Materials and Tissue Engineering, College of Chemistry and Materials Science, Fujian Normal University, Fuzhou, 350007, China

<sup>b</sup>Academy of Carbon Neutrality of Fujian Normal University, Fuzhou, 350007, China

<sup>c</sup>Fujian Provincial Key Laboratory of Theoretical and Computational Chemistry, Xiamen University, Xiamen, 361005, China

\*Corresponding author.

E-mail: yugt@fjnu.edu.cn (Guangtao Yu), chenwei@fjnu.edu.cn (Wei Chen)

## 1. Supporting Figures

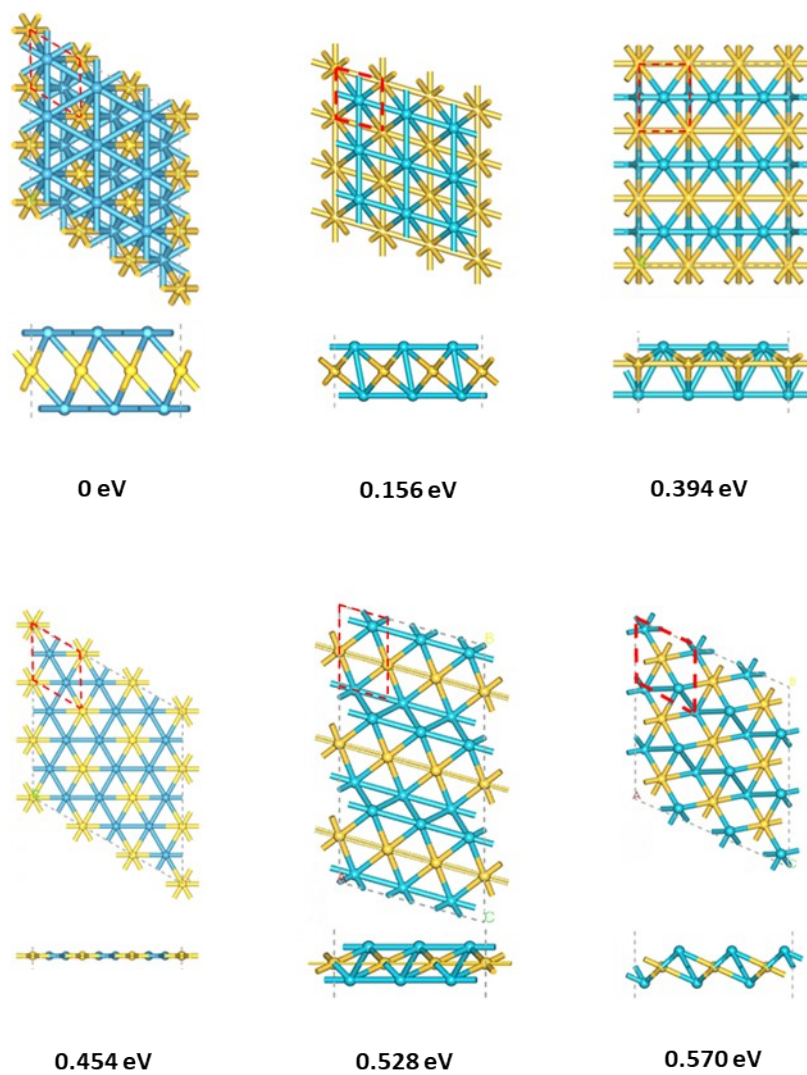

**Figure S1.** Possible 2D  $\text{Co}_2\text{Si}$  structures obtained through the PSO simulation implemented in CALYPSO code. The relative energy per atom is indicated.

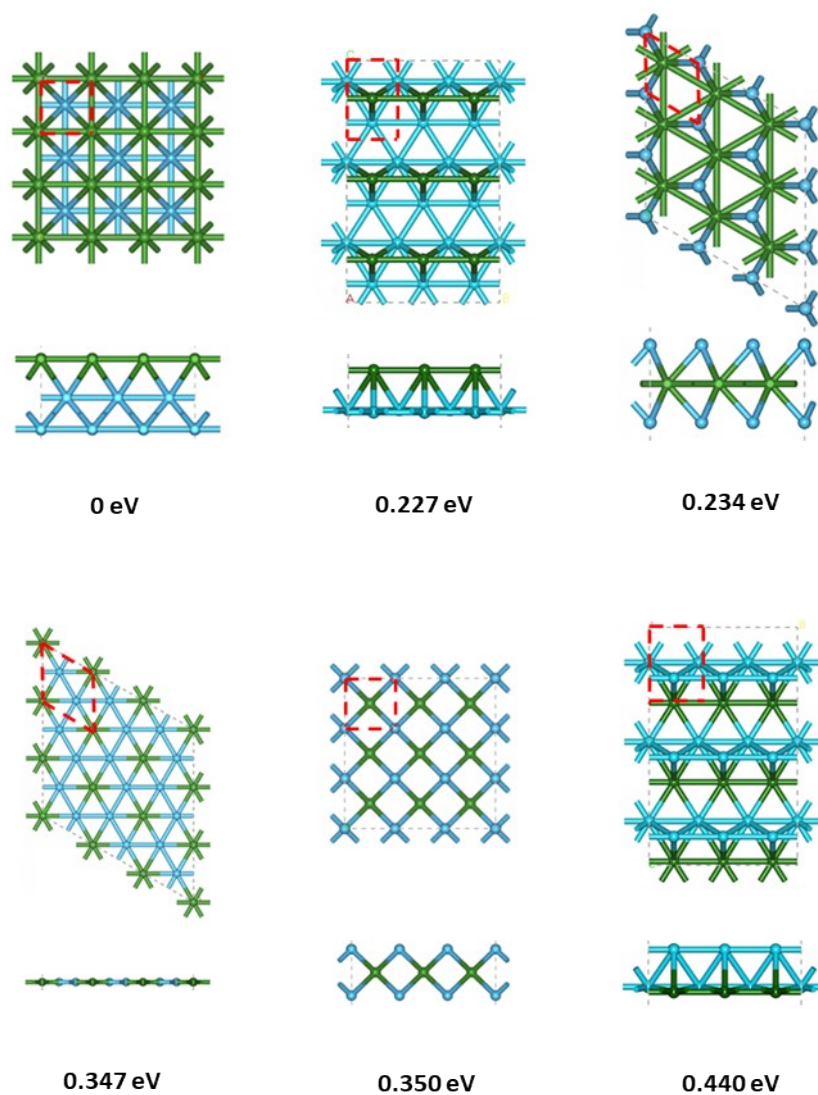

**Figure S2.** Possible 2D  $\text{Co}_2\text{Ge}$  structures obtained through the PSO simulation implemented in CALYPSO code. The relative energy per atom is indicated.

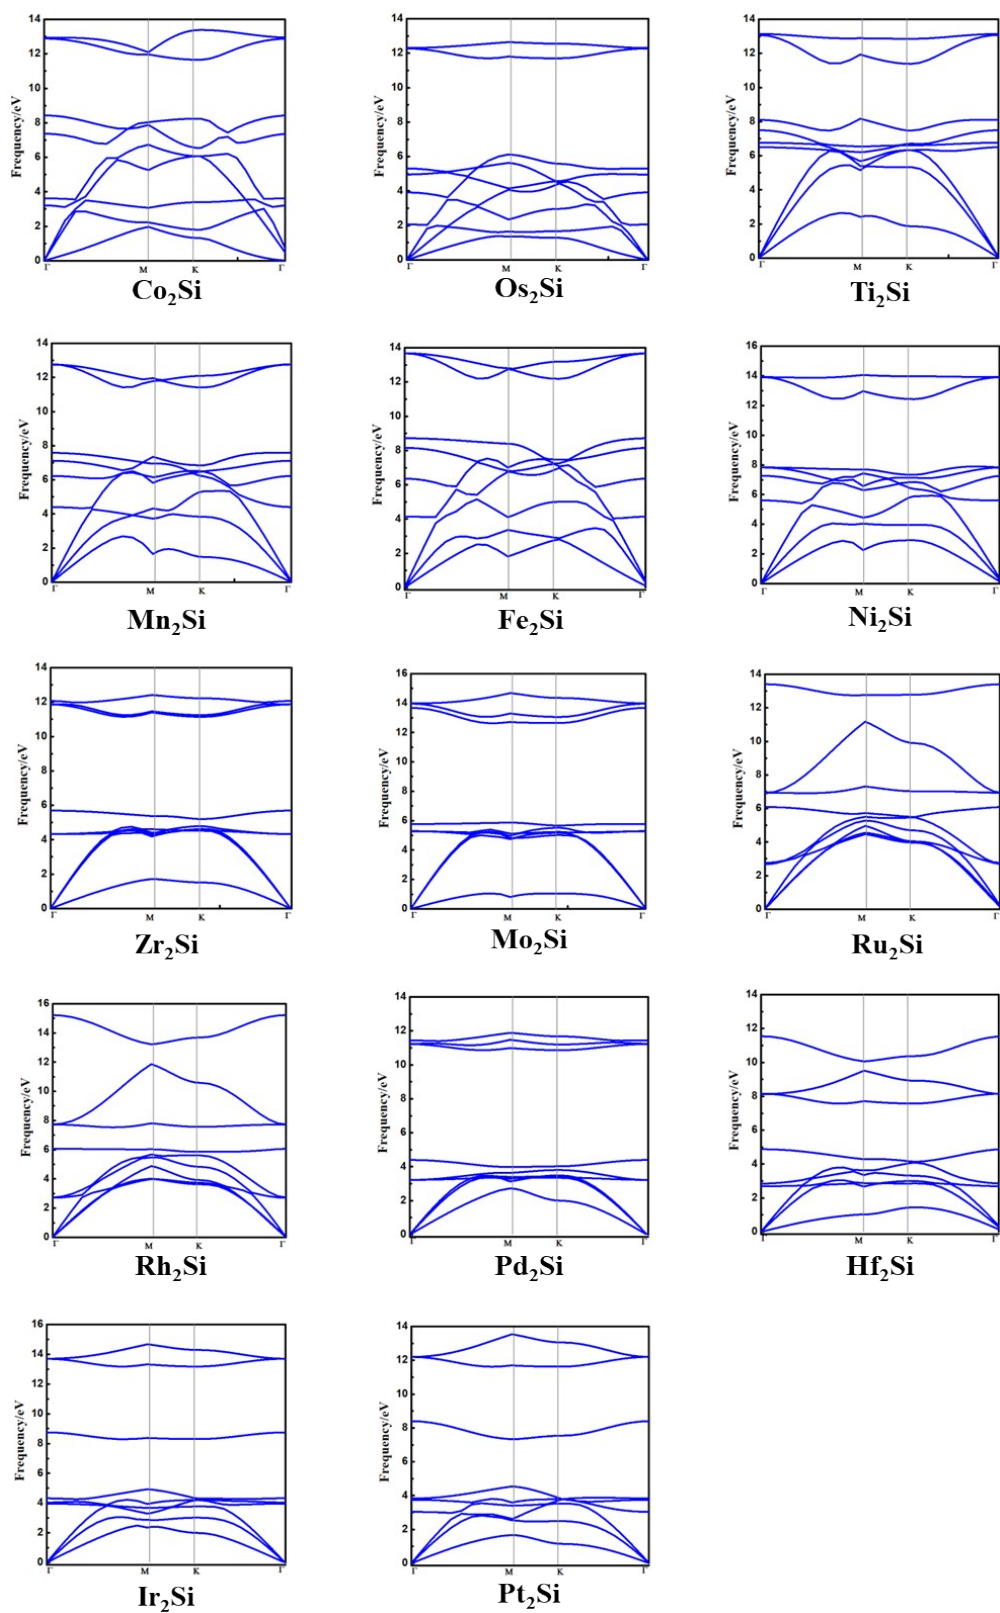

**Figure S3.** Phonon spectrum of the  $\text{TM}_2\text{Si}$  series.

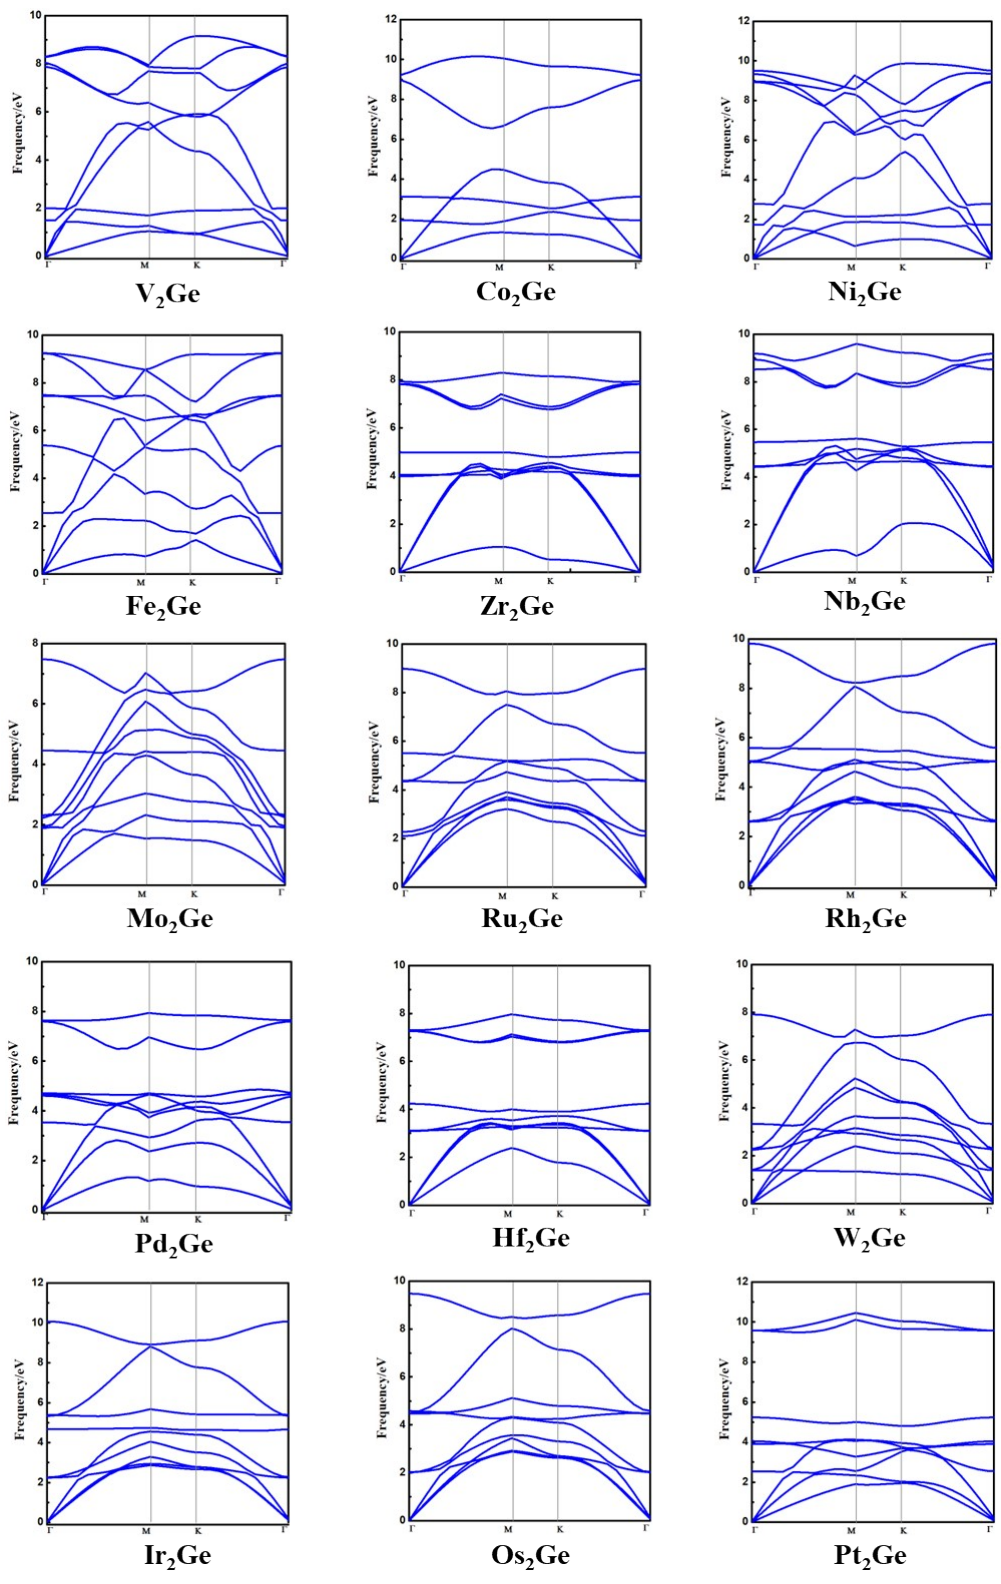

Figure S4. Phonon spectrum of the  $\text{TM}_2\text{Ge}$  series.

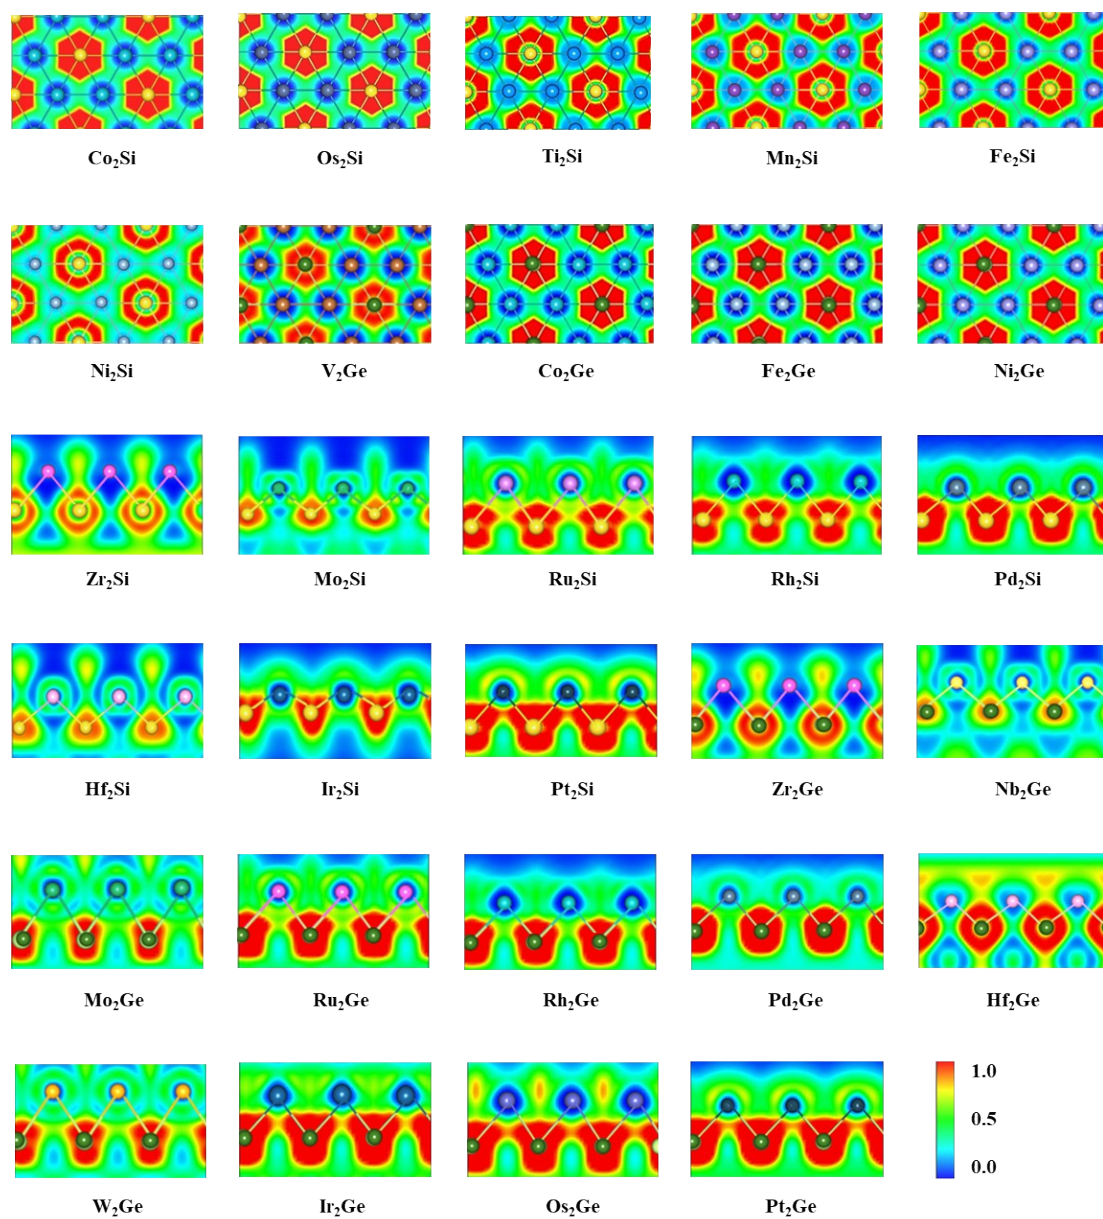

**Figure S5.** ELF maps of the  $TM_2X$  ( $X=Si$  and  $Ge$ ) systems, where the pictures in the first two rows are the top views of the planar and quasi-planar monolayers, and the others are the side views of the buckled monolayers.

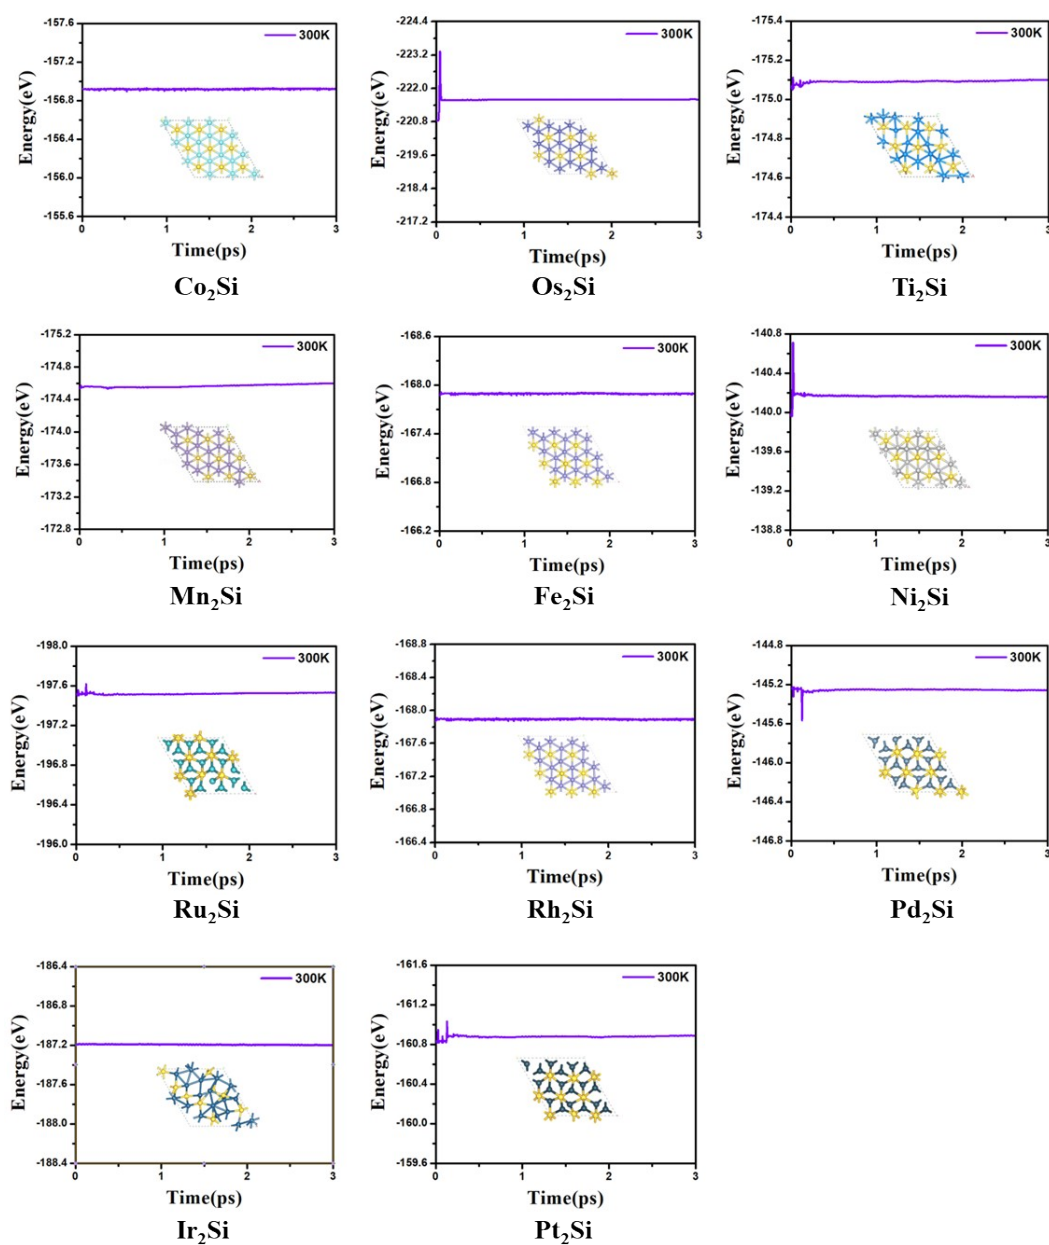

**Figure S6.** Evolution of total energy of the  $\text{TM}_2\text{Si}$  monolayers at 300 K from AIMD, and the corresponding snapshots after 3 ps.

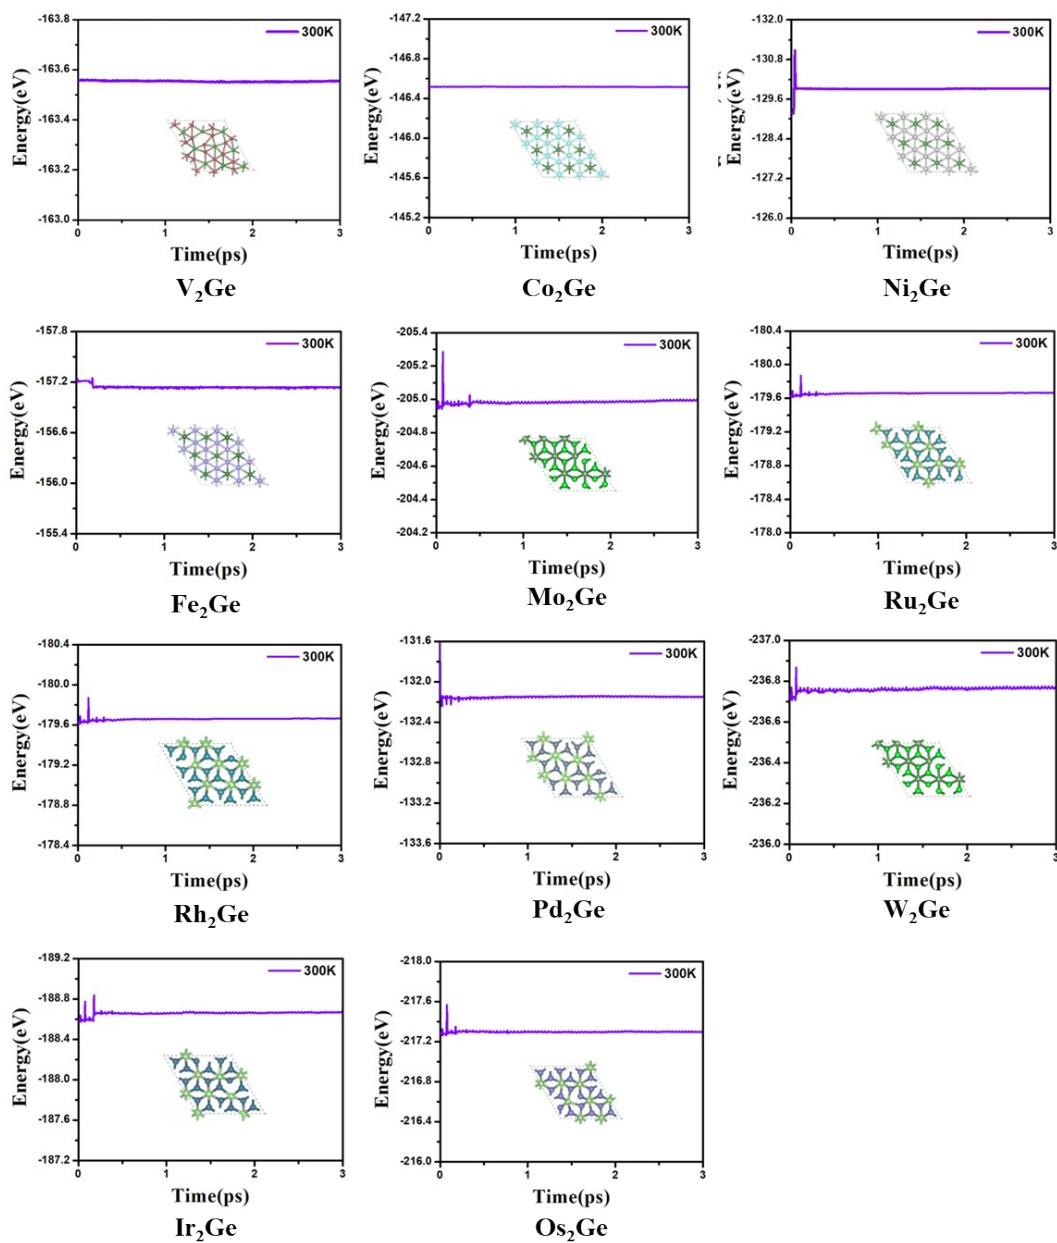

**Figure S7.** Evolution of total energy of the  $\text{TM}_2\text{Ge}$  monolayers at 300 K from AIMD, and the corresponding snapshots after 3 ps.



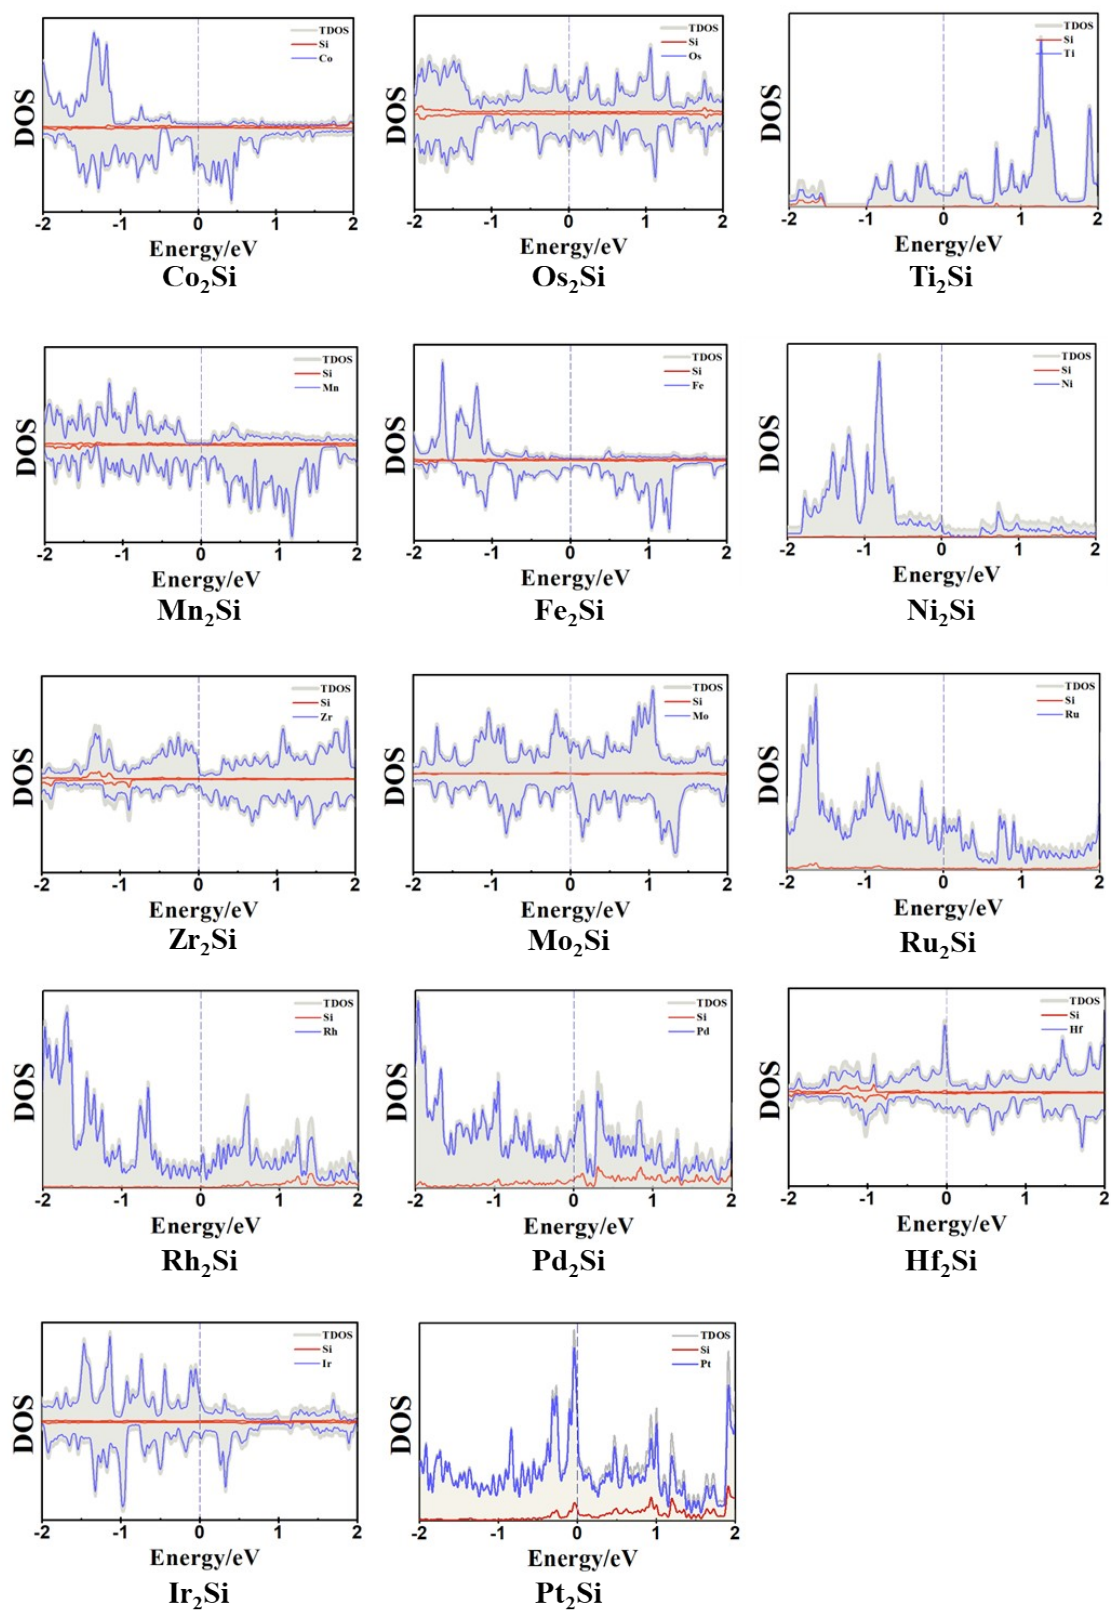

Figure S8. The calculated DOSs of the  $\text{TM}_2\text{Si}$  systems.

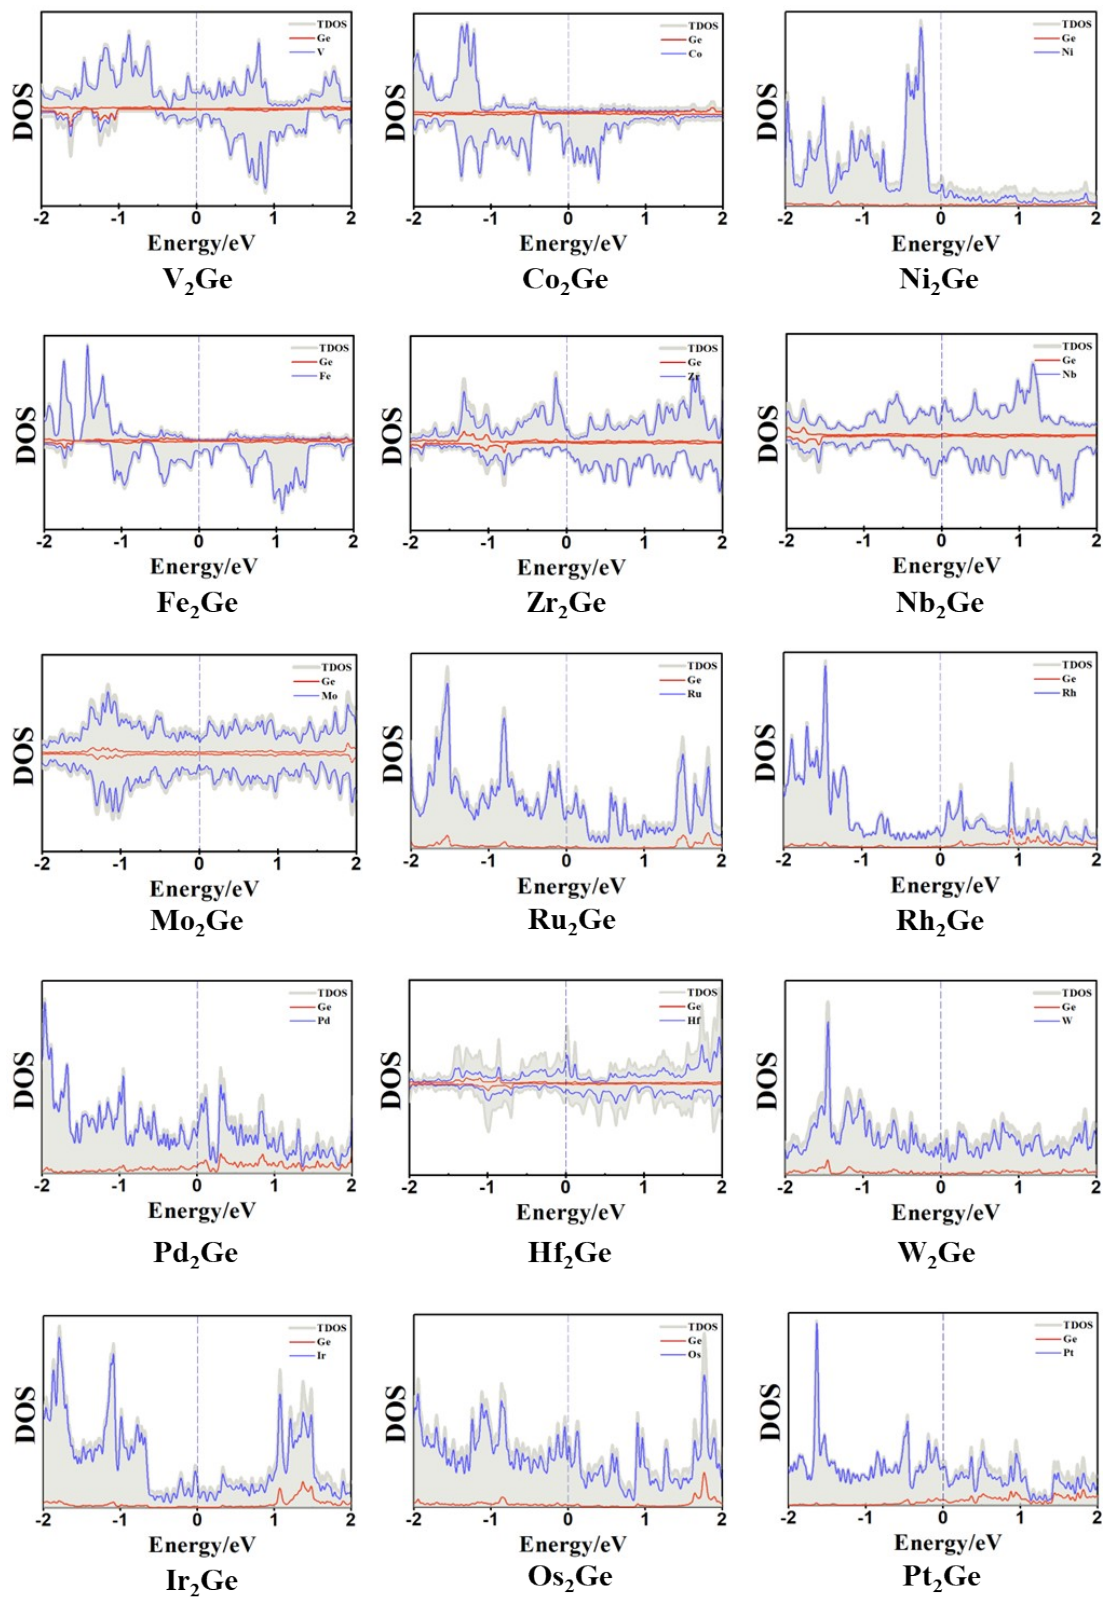

Figure S9. The calculated DOSs of the  $\text{TM}_2\text{Ge}$  systems.

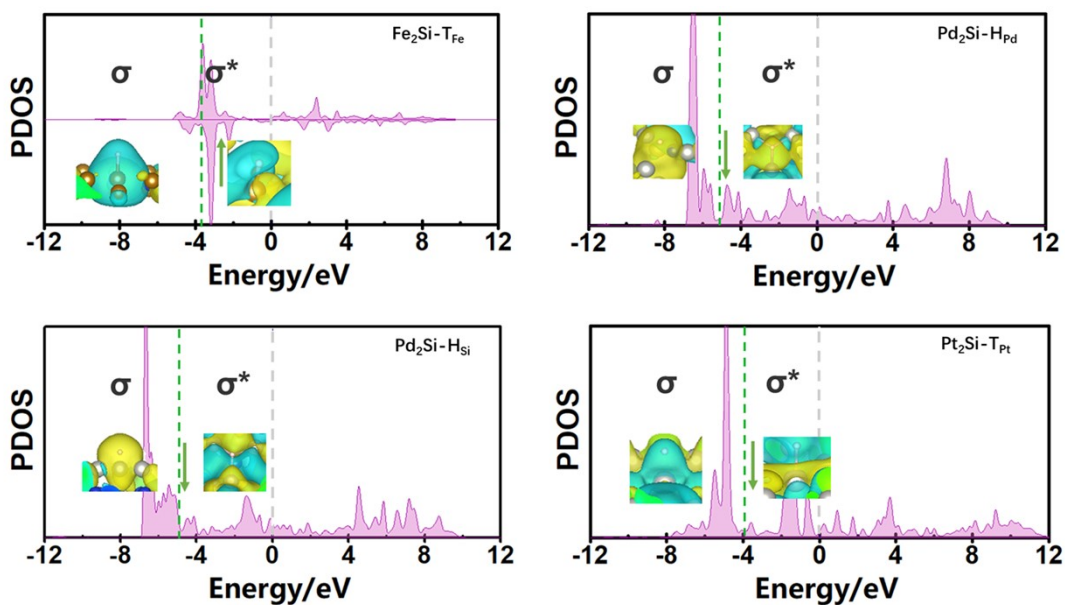

**Figure S10.** Partial density of states (PDOS) about the 1s orbital of H atom after the H adsorption of  $\text{TM}_2\text{Si}$  (TM=Fe, Pd and Pt). The Fermi level is set to zero marked by the gray dashed line. Inset: molecular orbitals related to the H atom adsorbed at the active site in different energy ranges marked by the green dashed line. The green arrow represents the  $\sigma_{1s}$ -center of the adsorbed H.

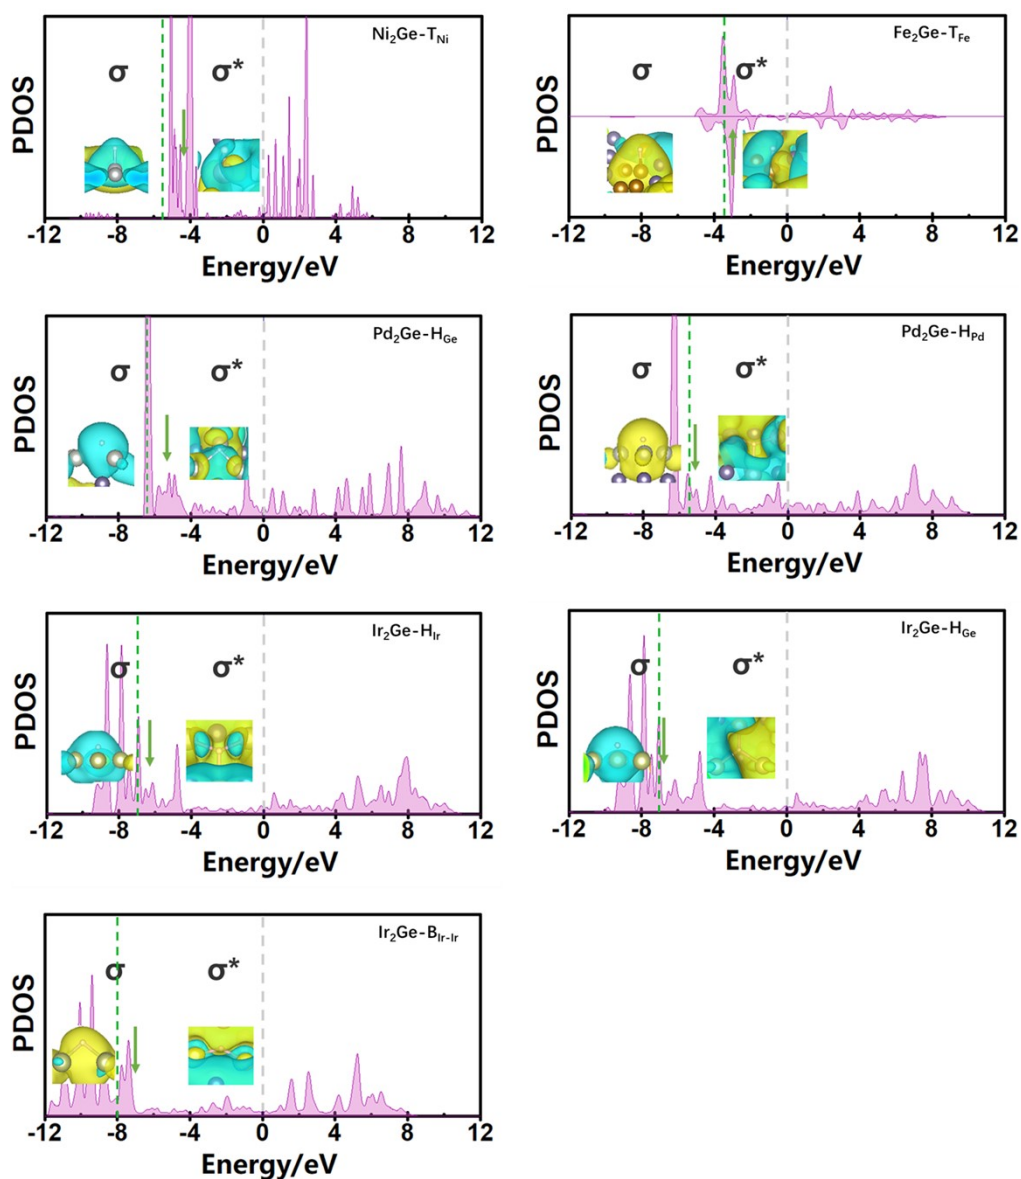

**Figure S11.** Partial density of states (PDOS) about the 1s orbital of H atom after the H adsorption of  $\text{TM}_2\text{Ge}$  (TM= Ni, Fe, Pd and Ir). The Fermi level is set to zero marked by the gray dashed line. Inset: molecular orbitals related to the H atom adsorbed at the active site in different energy ranges marked by the green dashed line. The green arrow represents the  $\sigma_{1\text{S}}$ -center of the adsorbed H.

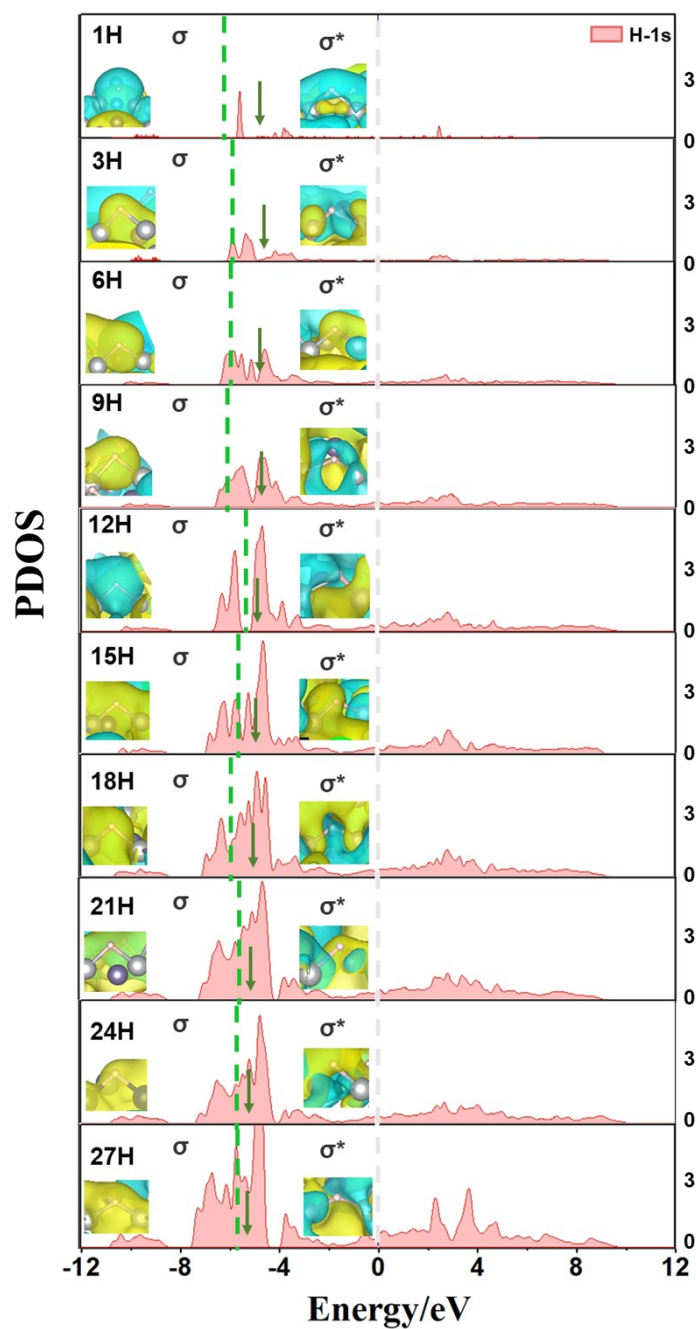

**Figure S12.** PDOS about the 1s orbitals of H atoms as well as the  $\sigma_{1S}$ -center for H adsorbed on the Ni<sub>2</sub>Ge monolayer under the different H coverages. The Fermi level is set to zero marked by the gray dashed line. Inset: Molecular orbitals related to the H atom adsorbed at the active site in different energy ranges marked by the green dashed line. The green arrow represents the  $\sigma_{1S}$ -center of the adsorbed H.

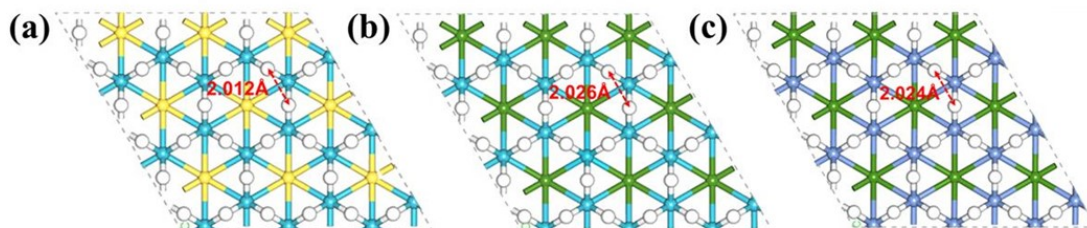

**Figure S13.** The calculated distance between two adjacent H atoms on the 2D Co<sub>2</sub>Si (a), Co<sub>2</sub>Ge (b), and Ni<sub>2</sub>Ge (c) monolayers at the highest hydrogen coverage ( $\theta_{\text{H}^*} = 3$  ML).

## 2. Supporting Tables

**Table S1.** The solvent effect on the computed  $\Delta G_{\text{H}^*}$  values of the sampled Co<sub>2</sub>Si monolayer.

| Adsorption sites   | $\Delta G_{\text{H}^*}$ (eV)<br>without solvation | $\Delta G_{\text{H}^*}$ (eV)<br>with solvation |
|--------------------|---------------------------------------------------|------------------------------------------------|
| B <sub>Co-Co</sub> | -0.076                                            | -0.077                                         |
| T <sub>Co</sub>    | 0.101                                             | 0.110                                          |
| T <sub>Si</sub>    | 0.346                                             | 0.357                                          |

**Table S2.** The calculated  $\Delta G_{H^*}$  values of 2D  $\text{Co}_2\text{Si}$  and  $\text{Co}_2\text{Ge}$  monolayers under the DFT+U method.

| Adsorption sites          | $\text{Co}_2\text{Si}$                         |                                             | $\text{Co}_2\text{Ge}$                         |                                             |
|---------------------------|------------------------------------------------|---------------------------------------------|------------------------------------------------|---------------------------------------------|
|                           | $\Delta G_{H^*}$ (eV) without $U_{\text{eff}}$ | $\Delta G_{H^*}$ (eV) with $U_{\text{eff}}$ | $\Delta G_{H^*}$ (eV) without $U_{\text{eff}}$ | $\Delta G_{H^*}$ (eV) with $U_{\text{eff}}$ |
| $\text{B}_{\text{Co-Co}}$ | -0.076                                         | -0.120                                      | -0.083                                         | -0.099                                      |
| $\text{T}_{\text{Co}}$    | 0.101                                          | 0.052                                       | 0.095                                          | 0.074                                       |
| $\text{T}_{\text{Si/Ge}}$ | 0.346                                          | 0.329                                       | 0.604                                          | 0.574                                       |

**Table S3.** Structural information of the predicted TM<sub>2</sub>Si monolayers, including the lattice parameters (a and b), bond lengths, and buckled heights (h).

| Systems                 |                         | a=b (Å) | Bond Lengths (Å) |       | h (Å) |
|-------------------------|-------------------------|---------|------------------|-------|-------|
|                         |                         |         | TM-TM            | TM-Si |       |
| <b>Planar</b>           | <b>Co<sub>2</sub>Si</b> | 4.005   | 2.309            | 2.309 | 0     |
|                         | <b>Os<sub>2</sub>Si</b> | 3.486   | 2.460            | 2.460 | 0     |
| <b>Quasi-planar</b>     | <b>Ti<sub>2</sub>Si</b> | 3.933   | 2.925            | 2.451 | 1.842 |
|                         | <b>Mn<sub>2</sub>Si</b> | 3.890   | 2.668            | 2.358 | 1.440 |
|                         | <b>Fe<sub>2</sub>Si</b> | 3.931   | 2.418            | 2.308 | 0.831 |
|                         | <b>Ni<sub>2</sub>Si</b> | 3.780   | 2.526            | 2.215 | 1.404 |
| <b>Buckled</b>          | <b>Zr<sub>2</sub>Si</b> | 3.600   | (3.681)          | 2.574 | 3.038 |
|                         | <b>Mo<sub>2</sub>Si</b> | 3.409   | (3.253)          | 2.356 | 2.590 |
|                         | <b>Ru<sub>2</sub>Si</b> | 2.715   | (3.976)          | 2.407 | 3.654 |
|                         | <b>Rh<sub>2</sub>Si</b> | 2.800   | (3.819)          | 2.368 | 3.460 |
|                         | <b>Pd<sub>2</sub>Si</b> | 3.190   | (3.553)          | 2.387 | 3.038 |
|                         | <b>Hf<sub>2</sub>Si</b> | 3.600   | (3.692)          | 2.578 | 3.050 |
|                         | <b>Ir<sub>2</sub>Si</b> | 3.560   | (2.970)          | 2.318 | 2.144 |
| <b>Pt<sub>2</sub>Si</b> | 2.985                   | (3.722) | 2.385            | 3.299 |       |



**Table S4.** Structural information of the predicted TM<sub>2</sub>Ge monolayers, including the lattice parameters (a and b), bond lengths, and buckled heights (h).

| Systems                 | a=b (Å)                 | Bond Lengths (Å) |         | h (Å) |       |
|-------------------------|-------------------------|------------------|---------|-------|-------|
|                         |                         | TM-TM            | TM-Si   |       |       |
| <b>Planar</b>           | <b>V<sub>2</sub>Ge</b>  | 4.450            | 2.569   | 2.569 | 0     |
|                         | <b>Co<sub>2</sub>Ge</b> | 4.078            | 2.355   | 2.355 | 0     |
|                         | <b>Ni<sub>2</sub>Ge</b> | 4.105            | 2.349   | 2.349 | 0     |
| <b>Quasi-planar</b>     | <b>Fe<sub>2</sub>Ge</b> | 4.051            | 2.456   | 2.369 | 0.750 |
| <b>Buckled</b>          | <b>Zr<sub>2</sub>Ge</b> | 3.630            | (3.771) | 2.610 | 3.134 |
|                         | <b>Nb<sub>2</sub>Ge</b> | 3.490            | (3.557) | 2.492 | 2.931 |
|                         | <b>Mo<sub>2</sub>Ge</b> | 2.750            | (4.662) | 2.706 | 4.383 |
|                         | <b>Ru<sub>2</sub>Ge</b> | 2.770            | (4.154) | 2.496 | 3.834 |
|                         | <b>Rh<sub>2</sub>Ge</b> | 2.880            | (3.951) | 2.450 | 3.584 |
|                         | <b>Pd<sub>2</sub>Ge</b> | 3.143            | (3.816) | 2.472 | 3.356 |
|                         | <b>Hf<sub>2</sub>Ge</b> | 3.602            | (3.773) | 2.607 | 3.148 |
|                         | <b>W<sub>2</sub>Ge</b>  | 2.750            | (4.646) | 2.695 | 4.356 |
|                         | <b>Os<sub>2</sub>Ge</b> | 2.754            | (4.189) | 2.507 | 3.876 |
|                         | <b>Ir<sub>2</sub>Ge</b> | 2.835            | (3.999) | 2.451 | 3.649 |
| <b>Pt<sub>2</sub>Ge</b> | 3.050                   | (3.863)          | 2.461   | 3.438 |       |

**Table S5.** The TM-TM and TM-Si bond lengths in  $\text{TM}_2\text{Si}$ , as well as in the relevant material systems synthesized experimentally.

| Systems             |                                          | Bond Lengths (Å) |                                    |            |               |                                    |                             |
|---------------------|------------------------------------------|------------------|------------------------------------|------------|---------------|------------------------------------|-----------------------------|
|                     |                                          | TM-TM            |                                    |            | TM-Si         |                                    |                             |
|                     |                                          | In this study    | In relevant experimental materials |            | In this study | In relevant experimental materials |                             |
| <b>Planar</b>       | <b><math>\text{Co}_2\text{Si}</math></b> | 2.309            | 2.470                              | Co         | 2.309         | 2.488                              | $\text{Co}_3\text{Si}$      |
|                     | <b><math>\text{Os}_2\text{Si}</math></b> | 2.460            | 2.682                              | Os         | 2.460         | 2.554                              | OsSi                        |
| <b>Quasi-planar</b> | <b><math>\text{Ti}_2\text{Si}</math></b> | 2.925            | 2.936                              | Ti         | 2.451         | 2.547                              | $\text{TiSi}_2$             |
|                     | <b><math>\text{Mn}_2\text{Si}</math></b> | 2.668            | 2.750                              | Mn         | 2.358         | 2.529                              | $\text{Mn}_3\text{SiIr}$    |
|                     | <b><math>\text{Fe}_2\text{Si}</math></b> | 2.418            | 2.585                              | Fe         | 2.308         | 2.766                              | $\text{Fe}_{11}\text{Si}_5$ |
|                     | <b><math>\text{Ni}_2\text{Si}</math></b> | 2.526            | 2.630                              | TiNi(TiCo) | 2.215         | 2.332                              | $\text{NiSi}_2$             |
| <b>Buckled</b>      | <b><math>\text{Zr}_2\text{Si}</math></b> | --               | --                                 | --         | 2.574         | 2.778                              | $\text{ZrFeSi}$             |
|                     | <b><math>\text{Mo}_2\text{Si}</math></b> | --               | --                                 | --         | 2.356         | 2.605                              | $\text{MoSi}_2$             |
|                     | <b><math>\text{Ru}_2\text{Si}</math></b> | --               | --                                 | --         | 2.407         | 2.412                              | RuSi                        |
|                     | <b><math>\text{Rh}_2\text{Si}</math></b> | --               | --                                 | --         | 2.368         | 2.483                              | RhSi                        |
|                     | <b><math>\text{Pd}_2\text{Si}</math></b> | --               | --                                 | --         | 2.387         | 2.488                              | HfSiPd                      |
|                     | <b><math>\text{Hf}_2\text{Si}</math></b> | --               | --                                 | --         | 2.578         | 2.750                              | HfSiPd                      |
|                     | <b><math>\text{Ir}_2\text{Si}</math></b> | --               | --                                 | --         | 2.318         | 2.393                              | $\text{Mn}_3\text{SiIr}$    |
|                     | <b><math>\text{Pt}_2\text{Si}</math></b> | --               | --                                 | --         | 2.385         | 2.421                              | $\text{Pt}_2\text{Si}_3$    |

**Table S6.** The TM-TM and TM-Ge bond lengths in  $\text{TM}_2\text{Ge}$ , as well as in the relevant material systems synthesized experimentally.

| Systems                |                        | Bond Lengths (Å) |                                    |                             |               |                                    |                             |
|------------------------|------------------------|------------------|------------------------------------|-----------------------------|---------------|------------------------------------|-----------------------------|
|                        |                        | TM-TM            |                                    |                             | TM-Ge         |                                    |                             |
|                        |                        | In this study    | In relevant experimental materials |                             | In this study | In relevant experimental materials |                             |
| Planar                 | $\text{V}_2\text{Ge}$  | 2.569            | 2.583                              | V                           | 2.569         | 2.650                              | $\text{V}_3\text{Ge}$       |
|                        | $\text{Co}_2\text{Ge}$ | 2.355            | 2.470                              | Co                          | 2.355         | 2.372                              | $\text{Co}_5\text{Ge}_7$    |
|                        | $\text{Ni}_2\text{Ge}$ | 2.349            | 2.496                              | $\text{Ni}_3\text{Ge}$      | 2.349         | 2.496                              | $\text{Ni}_3\text{Ge}$      |
| Quasi-planar           | $\text{Fe}_2\text{Ge}$ | 2.456            | 2.482                              | $\text{Fe}_{13}\text{Ge}_3$ | 2.369         | 2.511                              | $\text{Fe}_{13}\text{Ge}_3$ |
| Buckled                | $\text{Zr}_2\text{Ge}$ | --               | --                                 | --                          | 2.610         | 2.861                              | $\text{ZrGeIr}$             |
|                        | $\text{Nb}_2\text{Ge}$ | --               | --                                 | --                          | 2.492         | 2.910                              | $\text{Nb}_3\text{Ge}$      |
|                        | $\text{Mo}_2\text{Ge}$ | --               | --                                 | --                          | 2.706         | 2.710                              | $\text{Mo}_3\text{Ge}$      |
|                        | $\text{Ru}_2\text{Ge}$ | --               | --                                 | --                          | 2.496         | 2.444                              | $\text{ScRuGe}_2$           |
|                        | $\text{Rh}_2\text{Ge}$ | --               | --                                 | --                          | 2.450         | 2.468                              | $\text{RhGe}$               |
|                        | $\text{Pd}_2\text{Ge}$ | --               | --                                 | --                          | 2.472         | 2.453                              | $\text{TiPdGe}$             |
|                        | $\text{Hf}_2\text{Ge}$ | --               | --                                 | --                          | 2.607         | 2.755                              | $\text{HfGe}_2$             |
|                        | $\text{W}_2\text{Ge}$  | --               | --                                 | --                          | 2.695         | 2.700                              | $\text{WGe}_2$              |
|                        | $\text{Os}_2\text{Ge}$ | --               | --                                 | --                          | 2.507         | 2.510                              | $\text{OsGe}_2$             |
|                        | $\text{Ir}_2\text{Ge}$ | --               | --                                 | --                          | 2.451         | 2.502                              | $\text{ZrIrGe}$             |
| $\text{Pt}_2\text{Ge}$ | --                     | --               | --                                 | 2.461                       | 2.462         | $\text{PtGeS}$                     |                             |

**Table S7.** The calculated elastic coefficients of the TM<sub>2</sub>Si monolayers.

| <b>Systems</b>          | <b>C<sub>11</sub>=C<sub>22</sub></b> | <b>C<sub>12</sub></b> | <b>C<sub>66</sub></b> |
|-------------------------|--------------------------------------|-----------------------|-----------------------|
| <b>Ti<sub>2</sub>Si</b> | 135.588                              | 114.969               | 10.314                |
| <b>Mn<sub>2</sub>Si</b> | 248.812                              | 64.710                | 92.051                |
| <b>Fe<sub>2</sub>Si</b> | 489.270                              | 207.126               | 140.653               |
| <b>Co<sub>2</sub>Si</b> | 134.790                              | 54.386                | 40.176                |
| <b>Ni<sub>2</sub>Si</b> | 281.647                              | 5.152                 | 138.247               |
| <b>Zr<sub>2</sub>Si</b> | 372.698                              | 168.653               | 102.022               |
| <b>Mo<sub>2</sub>Si</b> | 473.650                              | 71.769                | 200.941               |
| <b>Ru<sub>2</sub>Si</b> | 1296.801                             | 477.474               | 409.663               |
| <b>Pd<sub>2</sub>Si</b> | 106.312                              | 15.037                | 45.637                |
| <b>Hf<sub>2</sub>Si</b> | 607.575                              | 190.661               | 208.456               |
| <b>Ir<sub>2</sub>Si</b> | 472.927                              | 261.131               | 105.898               |
| <b>Pt<sub>2</sub>Si</b> | 254.809                              | 31.293                | 111.758               |

**Table S8.** The calculated elastic coefficients of the TM<sub>2</sub>Ge monolayers.

| <b>Systems</b>          | <b>C<sub>11</sub>=C<sub>22</sub></b> | <b>C<sub>12</sub></b> | <b>C<sub>66</sub></b> |
|-------------------------|--------------------------------------|-----------------------|-----------------------|
| <b>V<sub>2</sub>Ge</b>  | 449.825                              | 173.187               | 138.319               |
| <b>Fe<sub>2</sub>Ge</b> | 363.835                              | 198.101               | 82.867                |
| <b>Co<sub>2</sub>Ge</b> | 110.082                              | 43.175                | 32.537                |
| <b>Ni<sub>2</sub>Ge</b> | 476.347                              | 341.836               | 67.256                |
| <b>Zr<sub>2</sub>Ge</b> | 258.205                              | 147.002               | 55.602                |
| <b>Nb<sub>2</sub>Ge</b> | 353.544                              | 192.171               | 80.686                |
| <b>Ru<sub>2</sub>Ge</b> | 1220.584                             | 365.860               | 427.362               |
| <b>Rh<sub>2</sub>Ge</b> | 602.608                              | 169.360               | 216.624               |
| <b>Hf<sub>2</sub>Ge</b> | 610.430                              | 181.581               | 224.425               |
| <b>Os<sub>2</sub>Ge</b> | 1462.744                             | 835.523               | 313.610               |
| <b>Ir<sub>2</sub>Ge</b> | 1203.100                             | 321.130               | 440.985               |
| <b>Pt<sub>2</sub>Ge</b> | 63.245                               | 42.958                | 10.644                |

**Table S9.** The computed  $\Delta G_{H^*}$  values for  $TM_2Si$  systems. The symbol "--" indicates that structures with adsorbed  $H^*$  cannot be obtained.

| <b>Systems</b>          | <b>Adsorption sites</b> | <b><math>\Delta G_{H^*}</math> (eV)</b> |
|-------------------------|-------------------------|-----------------------------------------|
| <b>Ti<sub>2</sub>Si</b> | --                      |                                         |
| <b>Mn<sub>2</sub>Si</b> | --                      |                                         |
| <b>Fe<sub>2</sub>Si</b> | T <sub>Fe1</sub>        | 0.242                                   |
| <b>Co<sub>2</sub>Si</b> | T <sub>Si</sub>         | 0.346                                   |
|                         | T <sub>Co</sub>         | 0.101                                   |
|                         | B <sub>Co-Co</sub>      | -0.076                                  |
| <b>Ni<sub>2</sub>Si</b> | --                      |                                         |
| <b>Zr<sub>2</sub>Si</b> | H <sub>Zr</sub>         | -1.068                                  |
|                         | H <sub>Si</sub>         | -1.018                                  |
| <b>Mo<sub>2</sub>Si</b> | --                      |                                         |
| <b>Ru<sub>2</sub>Si</b> | H <sub>Ru</sub>         | -0.415                                  |
|                         | T <sub>Ru</sub>         | -0.390                                  |
| <b>Rh<sub>2</sub>Si</b> | --                      |                                         |
| <b>Pd<sub>2</sub>Si</b> | H <sub>Pd</sub>         | 0.076                                   |
|                         | H <sub>Si</sub>         | 0.246                                   |
| <b>Hf<sub>2</sub>Si</b> | H <sub>Hf</sub>         | -0.847                                  |
|                         | H <sub>Si</sub>         | -1.094                                  |
| <b>Os<sub>2</sub>Si</b> | T <sub>Si</sub>         | -0.780                                  |
|                         | T <sub>Os</sub>         | -1.351                                  |
| <b>Ir<sub>2</sub>Si</b> | --                      |                                         |
| <b>Pt<sub>2</sub>Si</b> | T <sub>Pt</sub>         | 0.203                                   |
|                         | H <sub>Pt</sub>         | 0.328                                   |
|                         | B <sub>Pt-Pt</sub>      | 0.292                                   |

**Table S10.** The computed  $\Delta G_{H^*}$  values for  $TM_2Ge$  systems. The symbol “--”indicates that structures with adsorbed  $H^*$  cannot be obtained.

| Systems                 | Adsorption sites   | $\Delta G_{H^*}$ (eV) |
|-------------------------|--------------------|-----------------------|
| <b>V<sub>2</sub>Ge</b>  | B <sub>V-V</sub>   | -0.504                |
| <b>Fe<sub>2</sub>Ge</b> | T <sub>Fe1</sub>   | 0.175                 |
|                         | T <sub>Fe2</sub>   | -0.197                |
|                         | B <sub>Fe-Fe</sub> | -0.293                |
| <b>Co<sub>2</sub>Ge</b> | T <sub>Ge</sub>    | 0.604                 |
|                         | T <sub>Co</sub>    | 0.095                 |
|                         | B <sub>Co-Co</sub> | -0.083                |
| <b>Ni<sub>2</sub>Ge</b> | T <sub>Ge</sub>    | 0.551                 |
|                         | T <sub>Ni</sub>    | 0.207                 |
|                         | B <sub>Ni-Ni</sub> | -0.333                |
| <b>Zr<sub>2</sub>Ge</b> | H <sub>Zr</sub>    | -1.362                |
|                         | H <sub>Ge</sub>    | -1.346                |
| <b>Nb<sub>2</sub>Ge</b> | --                 |                       |
| <b>Mo<sub>2</sub>Ge</b> | H <sub>Mo</sub>    | -1.129                |
|                         | H <sub>Ge</sub>    | -1.644                |
| <b>Ru<sub>2</sub>Ge</b> | H <sub>Ru</sub>    | 0.881                 |
|                         | T <sub>Ru</sub>    | -0.468                |
| <b>Rh<sub>2</sub>Ge</b> | T <sub>Rh</sub>    | -0.984                |
|                         | H <sub>Rh</sub>    | -1.498                |
|                         | H <sub>Ge</sub>    | -1.369                |
| <b>Pd<sub>2</sub>Ge</b> | H <sub>Pd</sub>    | 0.002                 |
|                         | H <sub>Ge</sub>    | 0.120                 |
| <b>Hf<sub>2</sub>Ge</b> | H <sub>Hf</sub>    | -1.309                |
|                         | H <sub>Ge</sub>    | -1.572                |
| <b>W<sub>2</sub>Ge</b>  | T <sub>W</sub>     | -1.183                |
|                         | H <sub>W</sub>     | -0.693                |
|                         | H <sub>Ge</sub>    | -0.726                |
| <b>Os<sub>2</sub>Ge</b> | H <sub>Os</sub>    | -0.754                |
| <b>Ir<sub>2</sub>Ge</b> | T <sub>Ir</sub>    | 0.351                 |
|                         | H <sub>Ir</sub>    | 0.152                 |
|                         | H <sub>Ge</sub>    | 0.212                 |
|                         | B <sub>Ir-Ir</sub> | 0.218                 |
| <b>Pt<sub>2</sub>Ge</b> | --                 |                       |

**Table S11.** The  $\sigma_{1s}$  centers for H adsorption on  $\text{TM}_2\text{Si}$  (TM=Co, Fe, Pd and Pt) monolayers.

| <b>Systems</b>          | <b>Adsorption sites</b> | <b><math>\sigma_{1s}</math> centers<br/>(eV)</b> |
|-------------------------|-------------------------|--------------------------------------------------|
| <b>Co<sub>2</sub>Si</b> | T <sub>Co</sub>         | -4.026                                           |
|                         | B <sub>Co-Co</sub>      | -4.855                                           |
| <b>Fe<sub>2</sub>Si</b> | T <sub>Fe1</sub>        | -3.255                                           |
| <b>Pd<sub>2</sub>Si</b> | H <sub>Pd</sub>         | -4.888                                           |
|                         | H <sub>Si</sub>         | -4.870                                           |
| <b>Pt<sub>2</sub>Si</b> | T <sub>Pt</sub>         | -3.816                                           |



**Table S12.** The  $\sigma_{1s}$  centers for H adsorption on  $\text{TM}_2\text{Ge}$  (TM=Co, Ni, Fe, Pd and Ir) monolayers.

| <b>Systems</b>          | <b>Adsorption sites</b> | <b><math>\sigma_{1s}</math> centers (eV)</b> |
|-------------------------|-------------------------|----------------------------------------------|
| <b>Co<sub>2</sub>Ge</b> | T <sub>Co</sub>         | -3.994                                       |
|                         | B <sub>Co-Co</sub>      | -4.778                                       |
| <b>Ni<sub>2</sub>Ge</b> | T <sub>Ni</sub>         | -4.323                                       |
| <b>Fe<sub>2</sub>Ge</b> | T <sub>Fe1</sub>        | -3.192                                       |
| <b>Pd<sub>2</sub>Ge</b> | H <sub>Pd</sub>         | -5.104                                       |
|                         | H <sub>Ge</sub>         | -5.116                                       |
| <b>Ir<sub>2</sub>Ge</b> | H <sub>Ir</sub>         | -6.285                                       |
|                         | H <sub>Ge</sub>         | -6.918                                       |
|                         | B <sub>Ir-Ir</sub>      | -7.005                                       |

**Table S13.** The  $\sigma_{1s}$  centers for H adsorption on the  $\text{Co}_2\text{Si}$ ,  $\text{Co}_2\text{Ge}$  and  $\text{Ni}_2\text{Ge}$  monolayers under the different H coverage.

| n  | $\sigma_{1s}$ centers (eV) |                        |                        |
|----|----------------------------|------------------------|------------------------|
|    | $\text{Co}_2\text{Si}$     | $\text{Co}_2\text{Ge}$ | $\text{Ni}_2\text{Ge}$ |
| 1  | -4.855                     | -4.778                 | -4.840                 |
| 3  | -4.708                     | -4.774                 | -4.745                 |
| 6  | -4.881                     | -4.679                 | -4.918                 |
| 9  | -5.062                     | -4.669                 | -4.866                 |
| 12 | -4.984                     | -4.820                 | -4.910                 |
| 15 | -4.959                     | -4.770                 | -5.066                 |
| 18 | -4.935                     | -4.788                 | -5.107                 |
| 21 | -5.062                     | -4.916                 | -5.210                 |
| 24 | -5.281                     | -5.073                 | -5.268                 |
| 27 | -5.407                     | -5.167                 | -5.475                 |
